# Supplementary material for: Co–Mo alloy oxide decorated carbon cloth as lithium host for dendrite-free lithium metal anode
Source: Royal Society of Chemistry journal article supplement (doi:10.1039/d3se00254c), 2023-01-01
Supplement: d3se00254c1.pdf [file d3se00254c1.pdf]

## Supporting Information

### Co-Mo alloy oxides decorated carbon cloth as lithium host for dendrite-free lithium metal anode

Xingjie Wang<sup>a</sup>, Shuai Liu<sup>a\*</sup>, Jing Shi<sup>a</sup>, Minghua Huang<sup>a</sup>, Zhicheng Shi<sup>a</sup>, Huanlei Wang<sup>a</sup>  
and Zhenhua Yan<sup>b</sup>.

*a. School of Materials Science and Engineering, Ocean University of China, Qingdao 266100, China.*

*b. Key Laboratory of Advanced Energy Materials Chemistry (Ministry of Education),  
College of Chemistry, Nankai University, Tianjin 300071, China.*

*\* Corresponding author. E-mail address: liushuai6980@ouc.edu.cn*

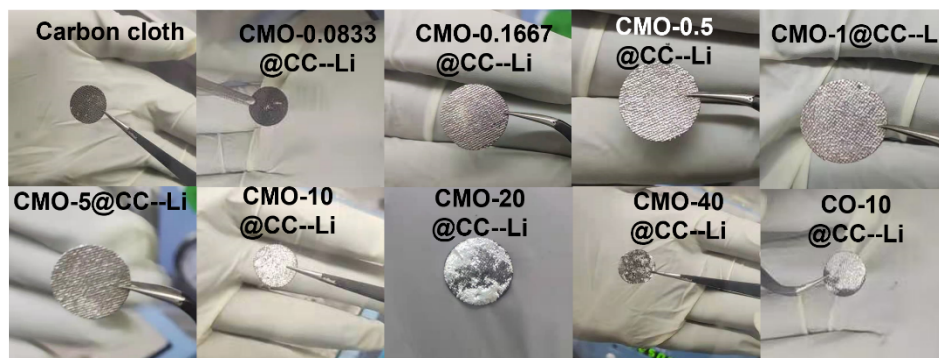

**Fig. S1** Photographs of carbon cloth, CMO-T@CC-Li, (T=0.0833, 0.167, 0.5, 1, 5, 10, 20, 40 represents the time of electrochemical deposition of Co-Mo alloy. The CMO-T@CC-Li were obtained by electrodeposition of Co-Mo alloy (T min), oxidation and molten lithium infusion on the surface of carbon cloth.) CO-10@CC-Li (The CO-10@CC-Li were obtained by electrodeposition of Co (10 min), oxidation and molten lithium infusion on the surface of carbon cloth.) after thermal infusion process of molten Li.

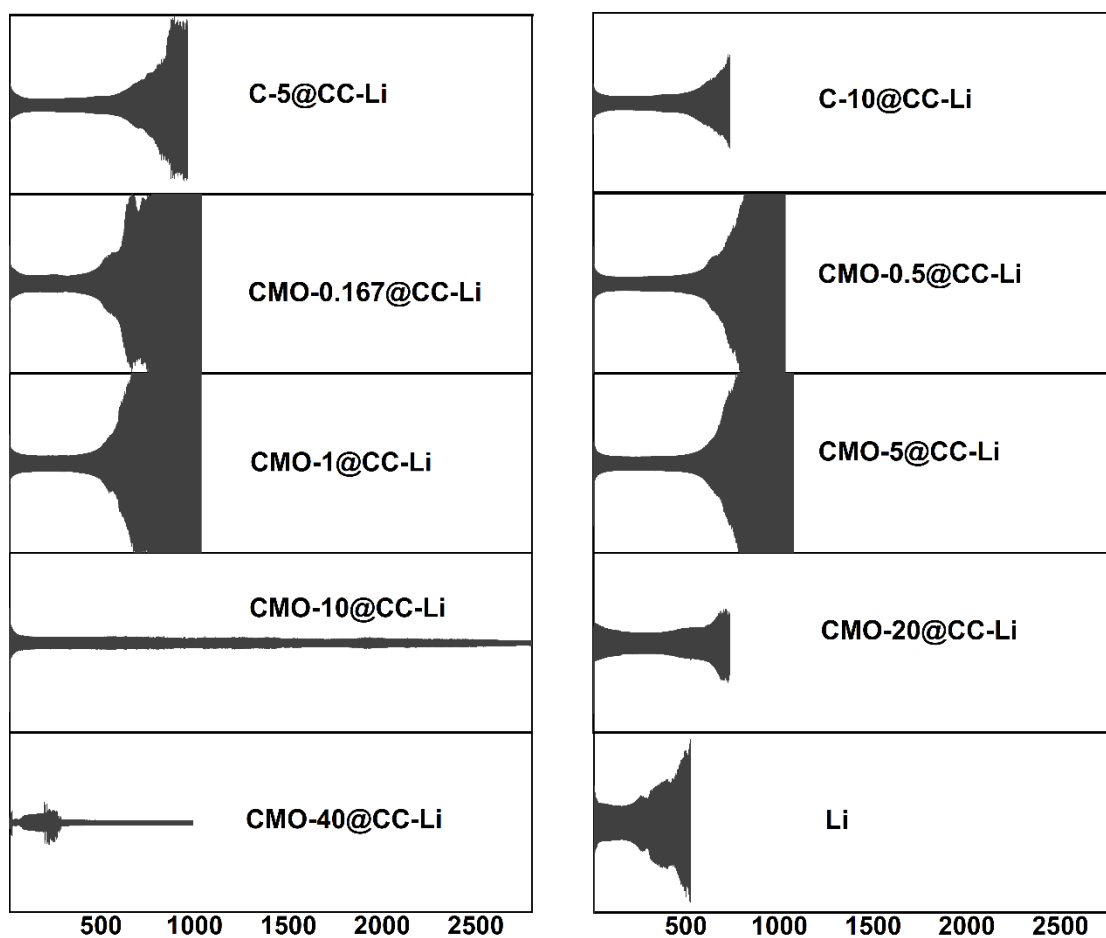

Fig. S2 Voltage profiles of (a) CO-5@CC-Li, (b) CO-10@CC-Li, (c) CMO-0.167@CC-Li, (d) CMO-0.5@CC-Li, (e) CMO-1@CC-Li, (f) CMO-5@CC-Li, (g) CMO-10@CC-Li, (h) CMO-20@CC-Li, (i) CMO-40@CC-Li and (j) bare Li in symmetric coin cells at  $1 \text{ mA cm}^{-2}$ ,  $1 \text{ mAh cm}^{-2}$ .

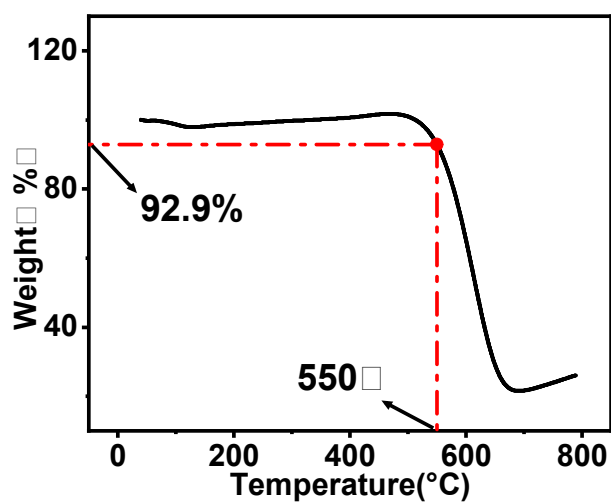

Fig. S3 Thermogravimetric curve of bare CM-10@CC under air atmosphere.

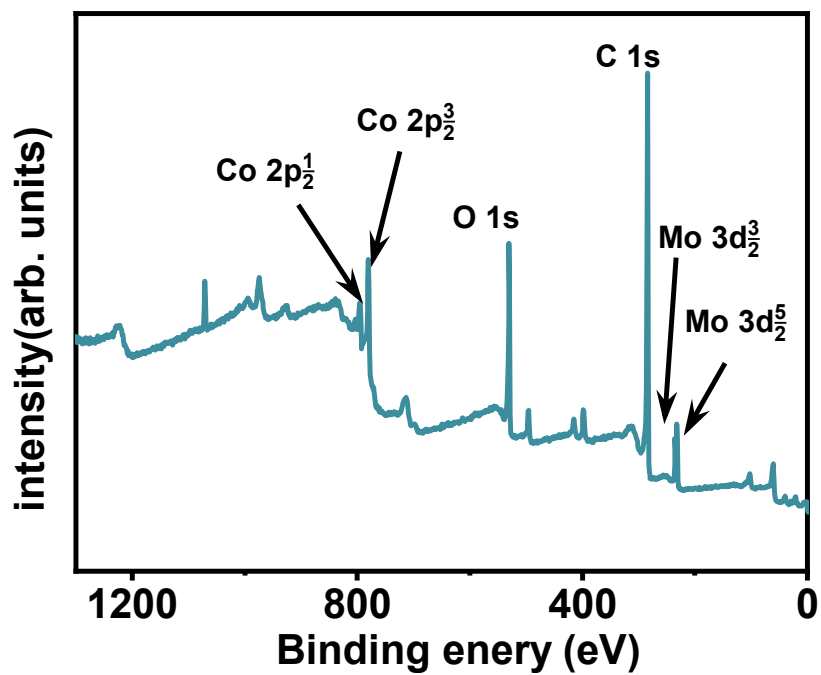

Fig. S4 XPS full survey spectrum of CMO-10@CC.

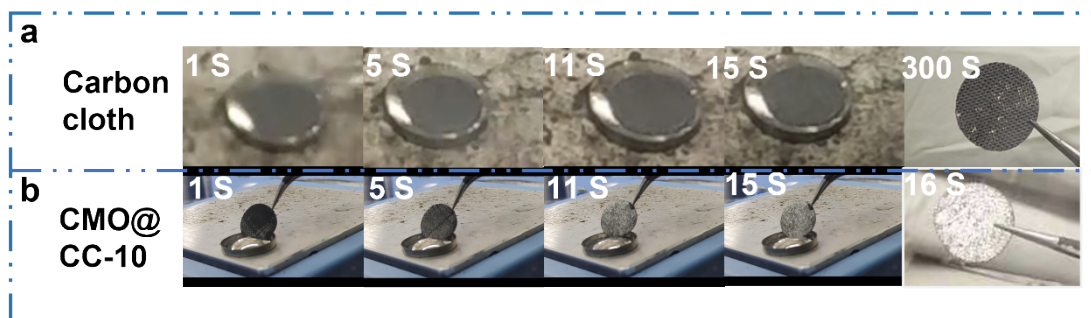

Fig. S5 (a) Photographs of molten Li infused into carbon cloth. (b) Photographs of the evolution of CMO-10@CC to CMO-10@CC-Li composite through 16 s thermal infusion process of molten Li.

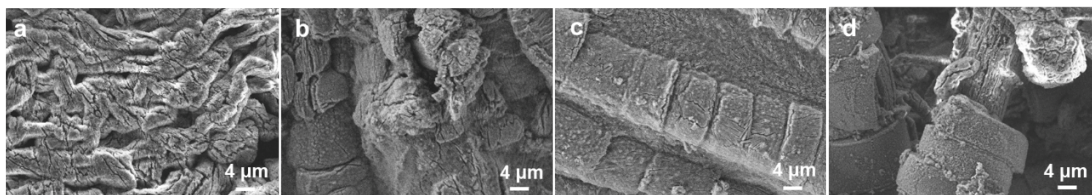

**Fig. S6** SEM images of (a)bare Li, (b)CMO-5@CC-Li, and (c)CMO-10@CC-Li (d)CMO-20@CC-Li, after first cycling at  $1 \text{ mA cm}^{-2}$   $1 \text{ mAh cm}^{-2}$ .

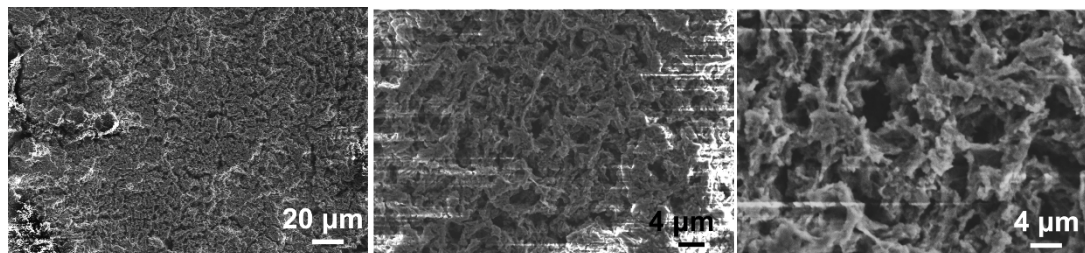

**Fig. S7** Top-view SEM images of bare Li electrodes after 100 cycles at  $2 \text{ mA cm}^{-2}$  with a capacity of  $1 \text{ mAh cm}^{-2}$ .

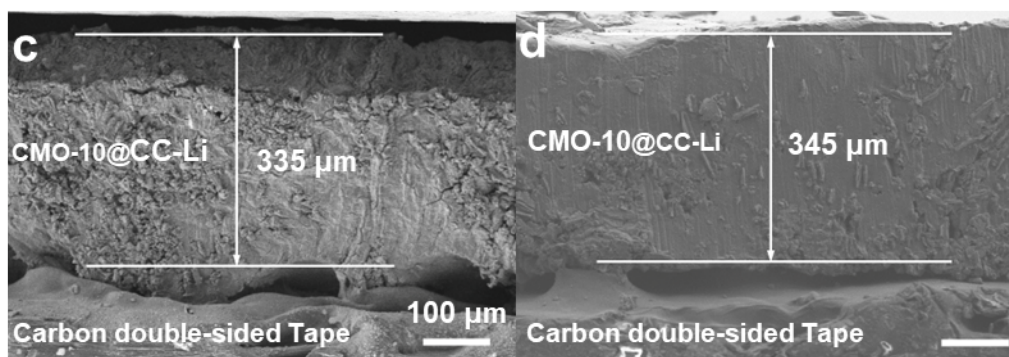

**Fig. S8** Cross-section view SEM images of bare Li before and after 100 cycles at  $2 \text{ mA cm}^{-2}$  with a capacity of  $1 \text{ mAh cm}^{-2}$ .

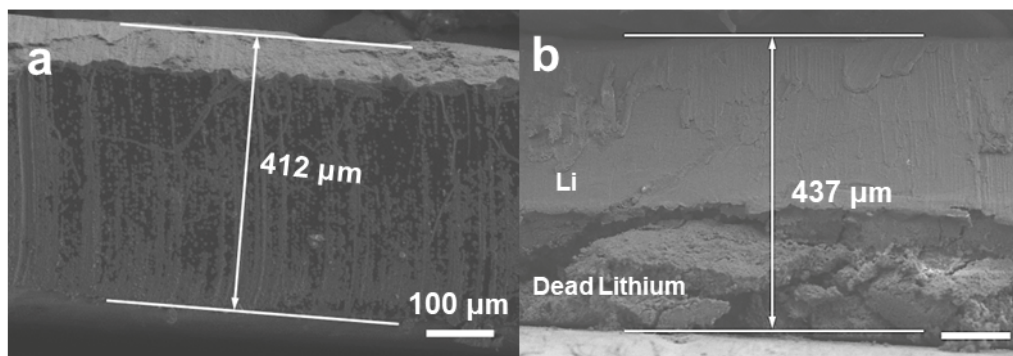

Fig. S9 Cross-section view SEM images of CMO-10@CC-Li before and after 100 cycles at  $2 \text{ mA cm}^{-2}$  with a capacity of  $1 \text{ mAh cm}^{-2}$ .

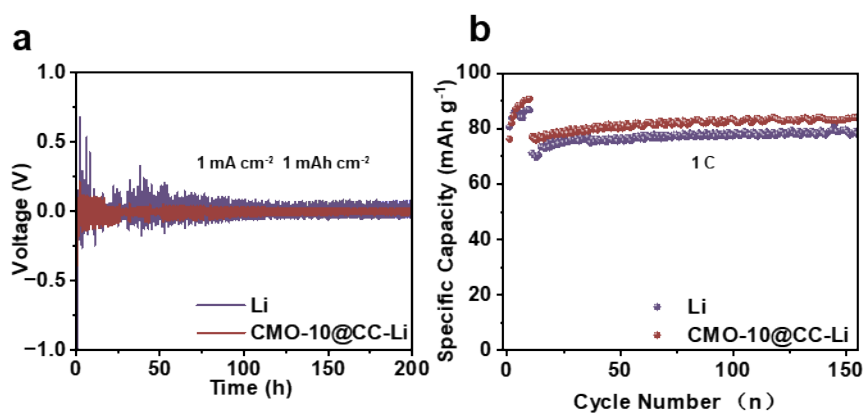

Fig. S10 Long-term cycling performance of (a) symmetric cells and (b) full cells with bare Li and CMO-5, 10, 20@CC-Li anodes ( $-5 \text{ }^\circ\text{C}$ )

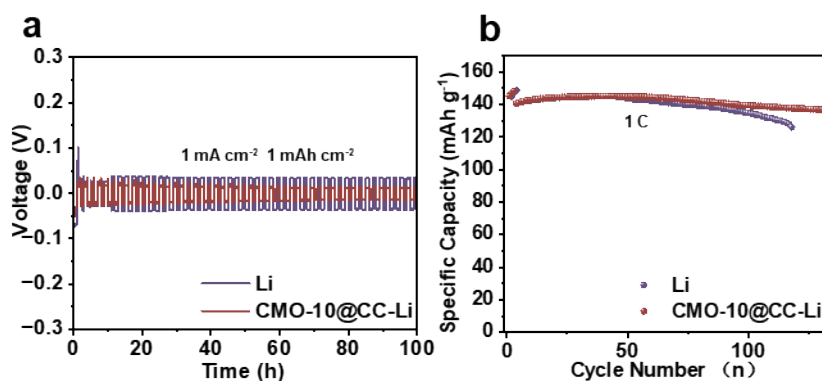

Fig. S11 Long-term cycling performance of (a) symmetric cells and (b) full cells with bare Li and CMO-5, 10, 20@CC-Li anodes ( $15 \mu\text{L mAh}^{-1}$ )

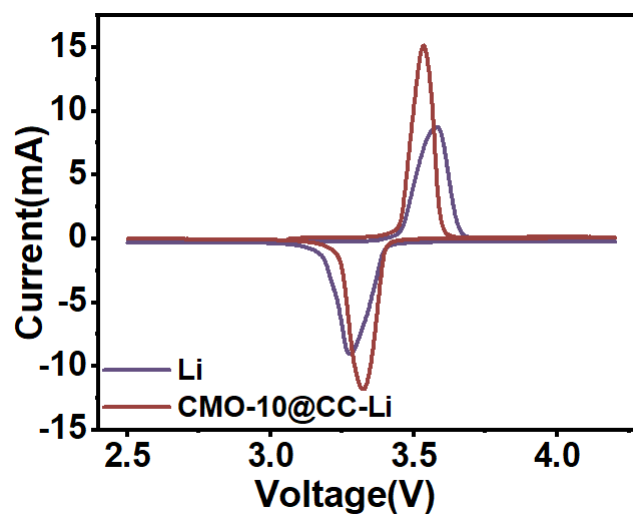

Fig. S12 CV curves of LFP||Li and LFP||CMO-10@CC-Li anodes.

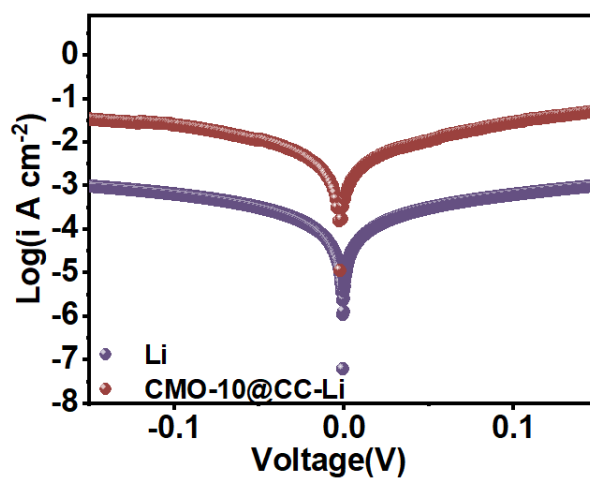

Fig. S13 Tafel curves of bare Li and CMO-10@CC-Li in symmetrical cells.

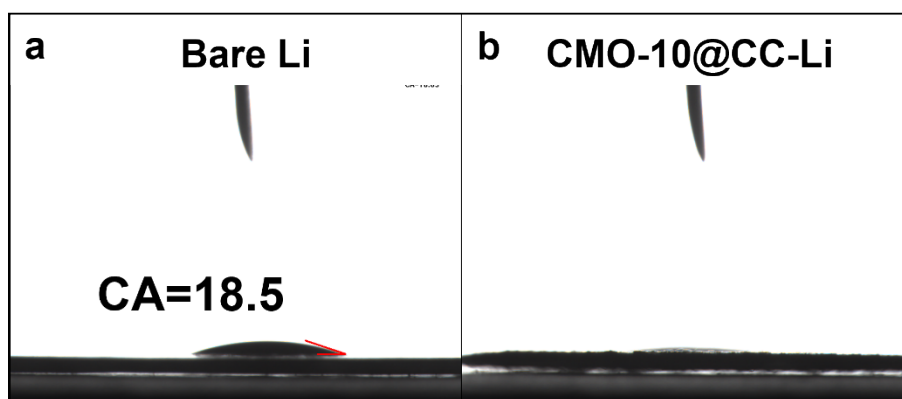

Fig. S14 Wetting angle of (a) bare Li and (b) CMO-10@CC-Li electrodes with electrolyte (Atmospheric Environment).

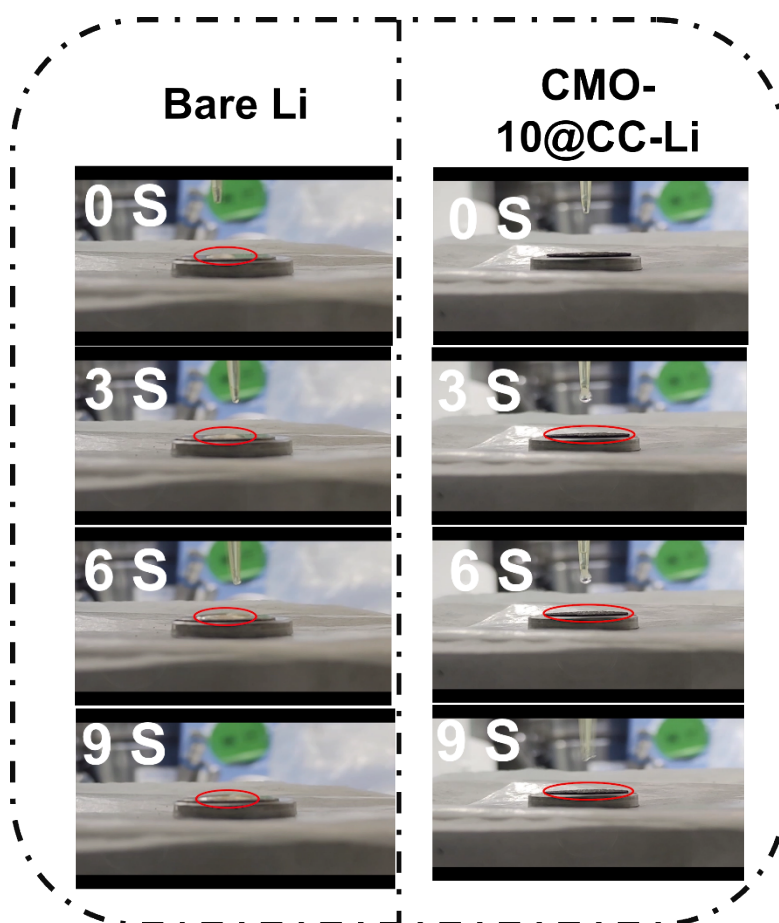

Fig. S15 Wettability test of bare Li electrode and CMO-10@CC-Li electrode with electrolyte (Argon gas environment).

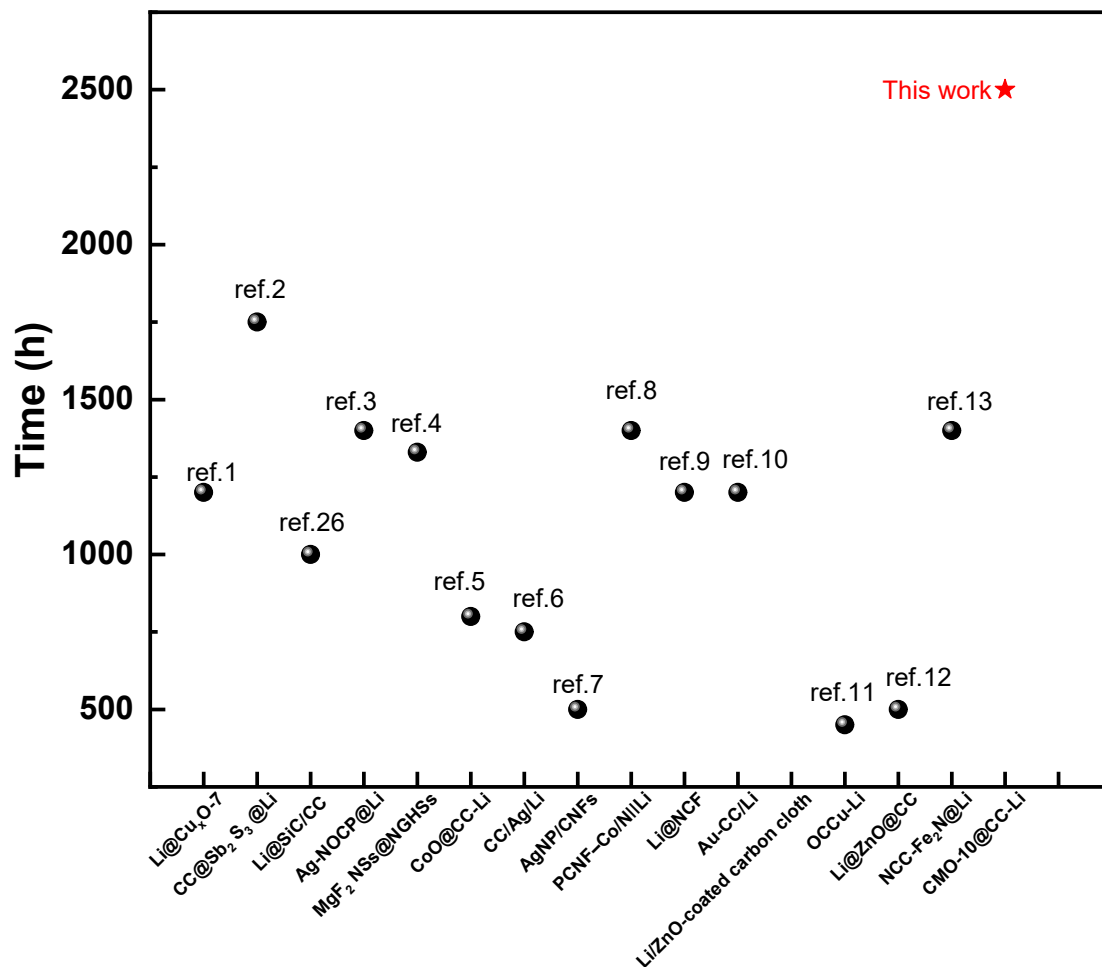

**Fig. S16 Comparison of the cycle life of symmetric cells with CMO-10@CC-Li anodes and those of previously reported excellent Li metal anodes at 1 mA cm<sup>-2</sup> with the cycling capacity of 1 mAh cm<sup>-2</sup> 1-13.**

## References

- 1 Y. Nie, X. Dai, J. Wang, Z. Qian, Z. Wang, H. Guo, G. Yan, D. Jiang, and R. Wang, Facile and scalable fabrication of lithiophilic Cu<sub>x</sub>O enables stable lithium metal anode., *J. Energy Chem.*, 2022, **75**, 285–292.
- 2 L. Luo, S. Xia, X. Zhang, J. Yang, and S. Zheng, In Situ Construction of Efficient Interface Layer with Lithiophilic Nanoseeds toward Dendrite-Free and Low N/P Ratio Li Metal Batteries., *Adv. Sci.*, 2022, **9**(8), 2104391.
- 3 B. Sun, Q. Zhang, W. Xu, R. Zhao, H. Zhu, W. Lv, X. Li, and N. Yang, A gradient topology host for a dendrite-free lithium metal anode., *Nano Energy*, 2022, **94**, 106937.
- 4 C. Lu, M. Tian, X. Zheng, C. Wei, M. H. Rummeli, P. Strasser, and R. Yang, Cotton pad derived 3D lithiophilic carbon host for robust Li metal anode: In-situ generated ionic conductive



- Li<sub>3</sub>N protective decoration., *Chem. Eng. J.*, 2021, **430**, 132722.
- 5 S. Li, L. Zhang, T. Liu, Y. Zhang, C. Guo, Y. Wang, and F. Du, A Dendrite-Free Lithium-Metal Anode Enabled by Designed Ultrathin MgF<sub>2</sub> Nanosheets Encapsulated Inside Nitrogen-Doped Graphene-Like Hollow Nanospheres., *Adv. Mater.*, 2022, **34**(24), 2201801.
- 6 L. Chen, G. Chen, W. Tang, H. Wang, F. Chen, X. Liu, and R. Ma, A robust and lithiophilic three-dimension framework of CoO nanorod arrays on carbon cloth for cycling-stable lithium metal anodes., *Mater. Today Energy*, 2020, **18**, 100520.
- 7 H. Cheng, H. Jin, H. Liu, N. Cai, C. Gao, P. Zhang, and M. Wang, An interconnected silver coated carbon cloth framework as a host to reduce lithium nucleation over-potential for dendrite-free lithium metal anodes., *J. Electroanal. Chem.*, 2020, **878**, 114569.
- 8 C. Yang, Y. Yao, S. He, H. Xie, E. Hitz, and L. Hu, Ultrafine Silver Nanoparticles for Seeded Lithium Deposition toward Stable Lithium Metal Anode., *Adv. Mater.*, 2017, **29**(38), 1702714.
- 9 C. Zhao, S. Xiong, H. Li, Z. Li, C. Qi, H. Yang, L. Wang, Y. Zhao, and T. Liu, A dendrite-free composite Li metal anode enabled by lithiophilic Co, N codoped porous carbon nanofibers., *J. Power Sources*, 2021, **483**, 229188.
- 10 J. Man, K. Liu, H. Zhang, Y. Du, J. Yin, X. Wang, and J. Sun, Dendrite-free lithium metal anode enabled by ion/electron-conductive N-doped 3D carbon fiber interlayer., *J. Power Sources*, 2021, **489**, 229524.
- 11 W. Chen, M. Fu, Q. Zhao, A. Zhou, W. Huang, and J. Wang, Au-modified 3D carbon cloth as a dendrite-free framework for Li metal with excellent electrochemical stability., *J. Alloys Compd.*, 2021, **871**, 159491.
- 12 H. Kang, M. Boyer, G. S. Hwang, and J. Lee, Lithium-coated carbon cloth for anode of Lithium rechargeable batteries with enhanced cycling stability., *Electrochimica Acta*, 2019, **303**, 78–84.
- 13 X.-Y. Yue, J. Bao, Q.-Q. Qiu, R.-J. Luo, Q.-C. Wang, X.-J. Wu, and Y.-N. Zhou, Copper decorated ultralight 3D carbon skeleton derived from soybean oil for dendrite-free Li metal anode., *Chem. Eng. J.*, 2020, **391**, 123516.
